# Supplementary material
Source: publisher figshare collection journal article supplement (https://acs.figshare.com/ndownloader/files/17262887)
Supplement: Supplementary file 1 [file 17262887]

# Label-free TOF-SIMS imaging of sulfur producing enzymes inside microglia cells following exposure to silver nanowires

*Bey F. Leo<sup>1,2</sup>, Sarah Fearn<sup>1</sup>, Daniel Gonzalez-Cater<sup>1,3</sup>, Ioannis Theodorou<sup>1</sup>, Pakatip Ruenraroengsak<sup>1</sup>, Angela E. Goode<sup>1</sup>, David McPhail<sup>1</sup>, David T. Dexter<sup>3</sup>, Milo Shaffer<sup>1,4</sup>, Kian F. Chung<sup>5</sup>, Alexandra E. Porter<sup>1\*</sup> and Mary P. Ryan<sup>1\*</sup>*

<sup>1</sup>Department of Materials and London Centre for Nanotechnology, Imperial College London, Exhibition Road, London, UK, SW7 2AZ

<sup>2</sup>Central Unit for Advanced Research Imaging (CENTUARI), Faculty of Medicine, University of Malaya 50603 Kuala Lumpur

<sup>3</sup>Innovation Center of NanonMedicine, 3 Chome-25-14, Tonomachi, Kawasaki, Japan 210-0821

<sup>4</sup>Department of Chemistry and London Centre for Nanotechnology, Imperial College London, Exhibition Road, London, UK, SW7 2AZ

<sup>5</sup> Experimental Studies, National Heart & Lung Institute, Imperial College London, London SW3 6LY

|                                                                                                                                                                                                                                                                                                                                                                                                                                                                                                                                                                                                                                                                                                                                                                                                                                                                                                                                                                                                                                                                                                                                                                              |    |
|------------------------------------------------------------------------------------------------------------------------------------------------------------------------------------------------------------------------------------------------------------------------------------------------------------------------------------------------------------------------------------------------------------------------------------------------------------------------------------------------------------------------------------------------------------------------------------------------------------------------------------------------------------------------------------------------------------------------------------------------------------------------------------------------------------------------------------------------------------------------------------------------------------------------------------------------------------------------------------------------------------------------------------------------------------------------------------------------------------------------------------------------------------------------------|----|
| FIG. S1: SECONDARY-ION SPECTRUM (NEGATIVE POLARITY) RECORDED FROM AGNWS IN MICROGLIA CELLS AFTER SPUTTERING WITH C60+. .....                                                                                                                                                                                                                                                                                                                                                                                                                                                                                                                                                                                                                                                                                                                                                                                                                                                                                                                                                                                                                                                 | 4  |
| FIG. S2: 3D AND 2D ION MAP OF (A) THE GLYCINE PROTEIN FRAGMENT AND (B) THE ALANINE PROTEIN FRAGMENT DURING THE ‘SPUTTER CLEAN’ WITH THE C60+ ION BEAM .....                                                                                                                                                                                                                                                                                                                                                                                                                                                                                                                                                                                                                                                                                                                                                                                                                                                                                                                                                                                                                  | 4  |
| FIG. S3: TOF-SIMS IMAGING (POSITIVE ION MODE) OF (A) MICROGLIA CELLS (24 H) EXPOSED TO THE AGNWS, POOLED SIGNALS OF (B) AMINO ACID FRAGMENT IONS, (C) CSE OR MPST ENZYMES FRAGMENT IONS, C <sub>2</sub> H <sub>6</sub> OS+ AND (D) CBS ENZYME FRAGMENT IONS, C <sub>2</sub> H <sub>6</sub> O <sub>2</sub> +. UNLIKE CBS, THE OTHER TWO H <sub>2</sub> S PRODUCING ENZYMES (CSE OR MPST) DO NOT HAVE METAL BINDING LIGANDS BUT CONTAIN S- GROUPS IN THEIR LIGANDS (TABLES S2-4). COLOUR SCALE BARS, WITH AMPLITUDE AS NUMBER OF COUNTS ARE INDICATED TO THE RIGHT OF EACH ION IMAGE. THE AMPLITUDE OF THE COLOUR SCALE CORRESPONDS TO THE MAXIMUM NUMBER OF COUNTS (MC) AND THE TOTAL NUMBER OF COUNTS (TC) RECORDED FOR THE SPECIFIED M/Z (IT IS THE SUM OF COUNTS IN ALL PIXELS). FIELD OF VIEW: 100 μM X 100 μM; (E) OVERLAY IMAGES OF PROTEIN FRAGMENTS (BLUE) AND CYSTATHIONINE FRAGMENTS (GREEN). .....                                                                                                                                                                                                                                                                 | 5  |
| FIG. S4: SEM IMAGES OF MICROGLIAL CELLS EXPOSED TO AGNWS BEFORE FIB MILLING AT (A) LOW AND (B) HIGH MAGNIFICATION AND (C) SIDE VIEW AND (D) TOP VIEW AFTER FIB MILLING. ....                                                                                                                                                                                                                                                                                                                                                                                                                                                                                                                                                                                                                                                                                                                                                                                                                                                                                                                                                                                                 | 6  |
| FIG. S5: AGNW UPTAKE BY N9 MICROGLIA FOLLOWING 1HR PULSE AGNW TREATMENT (50 μG/ML) WITH A 24 HR CHASE. HAADF-STEM IMAGE OF AGNWS IN MICROGLIA CELLS (A) AND A HIGH MAGNIFICATION IMAGE (B) OF THE SELECTED AREA IN (A). STEM-EDX SPECTRA (C) COLLECTED FROM AREAS 1-3 MARKED IN (B). HIGH PRESSURE FROZEN, LOW TEMPERATURE ACETONE-TREATED AND EPOXY RESIN-EMBEDDED MICROGLIA CELLULAR UPTAKE OF (D) AGNWS AFTER A 1 H PULSE EXPOSURE AND 24 H CHASE. (E) HR-TEM IMAGE SHOWS ULTRAFINE PARTICLES SURROUNDING THE SURFACE OF THE AGNWS. FFT PATTERNS TAKEN FROM CORRESPONDING AREAS (I - III) MARKED IN (E), SHOWING THAT SULFIDATION OCCURRED AT THE AGNWS SURFACE AND THE PRESENCE OF A LARGE NUMBER OF AG <sub>2</sub> S PARTICLES SURROUNDING THE AGNWS AFTER UPTAKE BY MICROGLIA. (N: NUCLEUS; C: CYTOPLASM; E/L: ENDOSOME/LYSOSOME; ES: EXTRACELLULAR SPACE). .....                                                                                                                                                                                                                                                                                                     | 7  |
| FIG. S6: A) QUANTIFICATION OF CBS (A-C), CSE (D-F) AND MPST (G-I) ENZYMES IN N9 CELLS EXPOSED TO AGNWS (50μG/ML) FOR 24H IN BY CONFOCAL MICROSCOPY. (C,F,I) THE FLUORESCENCE DETECTED IN 40 CELLS WAS SUBTRACTED FROM THE BACKGROUND FLUORESCENCE, AVERAGED AND COMPARED WITH THE CONTROL CELLS. MODULATION OF MICROGLIA (J) CBS, (K) CSE AND (L) MPST EXPRESSION BY AGNWS OR LPS TREATMENT USING IMMUNOSTAINING WESTERN BLOTS QUANTIFICATION METHOD. N9 MICROGLIA WERE TREATED WITH AGNWS (50 μG/ML) OR LPS (POSITIVE CONTROL) FOR 1 H (PULSE) FOLLOWED 24 H CHASE PERIOD. CBS/CSE/MPST PROTEIN WAS THEN QUANTIFIED BY IMMUNOSTAINING WESTERN BLOTS FROM WHOLE CELL LYSATES. IMMUNOSTAINING FOR B-ACTIN WAS USED AS LOADING CONTROL. (J-L) THE ENZYME EXPRESSION WAS QUANTIFIED BY NORMALIZING THE ENZYMES’ OPTICAL DENSITY AGAINST THE B-ACTIN OPTICAL DENSITY. *** INDICATE P < 0.005 VS. CONTROL, AS ASSESSED BY A ONE-WAY ANOVA WITH A TUKEY’S POST-HOC TEST. (M) ORIGINAL WESTERN BLOTS USED TO PLOT (J-L) WITH COMPARISON TO THE SPHERICAL SILVER NANOPARTICLES USED IN OUR PREVIOUS STUDY THAT DO SHOW INCREASED EXPRESSION OF CSE (HERE LABELLED AS CTH) [6]. ..... | 9  |
| FIG. S7: MODULATION OF MICROGLIAL REACTIVITY AND CELL VIABILITY BY AGNW TREATMENT. N9 MICROGLIAL CELLS WERE TREATED WITH LPS (500 NG/ML) WITH OR WITHOUT AGNWS FOR A 1 HR PULSE PERIOD FOLLOWED BY A 24 H CHASE PERIOD. CELL VIABILITY WAS ASSESSED THROUGH (A) LDH RELEASE ASSAY, (B) MTS ASSAY AND (C) IL-6. MICROGLIAL INFLAMMATION WAS ASSESSED THROUGH QUANTIFICATION OF (D,G) TNFA RELEASE, (E,H) ROS PRODUCTION, (F) MITOCHONDRIAL POTENTIAL, AND (I) NITRITE PRODUCTION. DATA IS PRESENTED AS MEAN ± SEM OF THREE INDEPENDENT EXPERIMENTS; *, **, **** INDICATE P < 0.05, 0.01, 0.001, RESPECTIVELY, VS. CONTROL; # INDICATE P < 0.05 VS. LPS TREATMENT AS ASSESSED BY A ONE-WAY ANOVA WITH TUKEY’S POST-HOC TEST.....                                                                                                                                                                                                                                                                                                                                                                                                                                               | 10 |

|                                                                                                                                |    |
|--------------------------------------------------------------------------------------------------------------------------------|----|
| TABLE S2: LIST OF LIGANDS WHICH ARE FOUND IN THE CBS ENZYME STRUCTURES (SOURCE: EUROPEAN PROTEIN DATA BANK) .....              | 11 |
| CYSTATHIONINE-B-SYNTHASE (CBS) (ENZYME COMMISSION NUMBER, EC 4.2.1.22) .....                                                   | 11 |
| TABLE S3: LIST OF LIGANDS WHICH ARE FOUND IN THE CSE ENZYME STRUCTURES (SOURCE: EUROPEAN PROTEIN DATA BANK). .....             | 12 |
| TABLE S4: LIST OF LIGANDS WHICH ARE FOUND IN THE MPST ENZYME STRUCTURES (SOURCE: EUROPEAN PROTEIN DATA BANK).....              | 12 |
| 3-MERCAPTOPYRUVATE SULFURTRANSFERASE (MPST) (EC 2.8.2.1) .....                                                                 | 12 |
| TABLE S5: THE CRYSTAL STRUCTURE OF SILVER AND VARIOUS SILVER COMPOUNDS BASED ON THE INORGANIC CRYSTAL STRUCTURE DATABASE. .... | 13 |

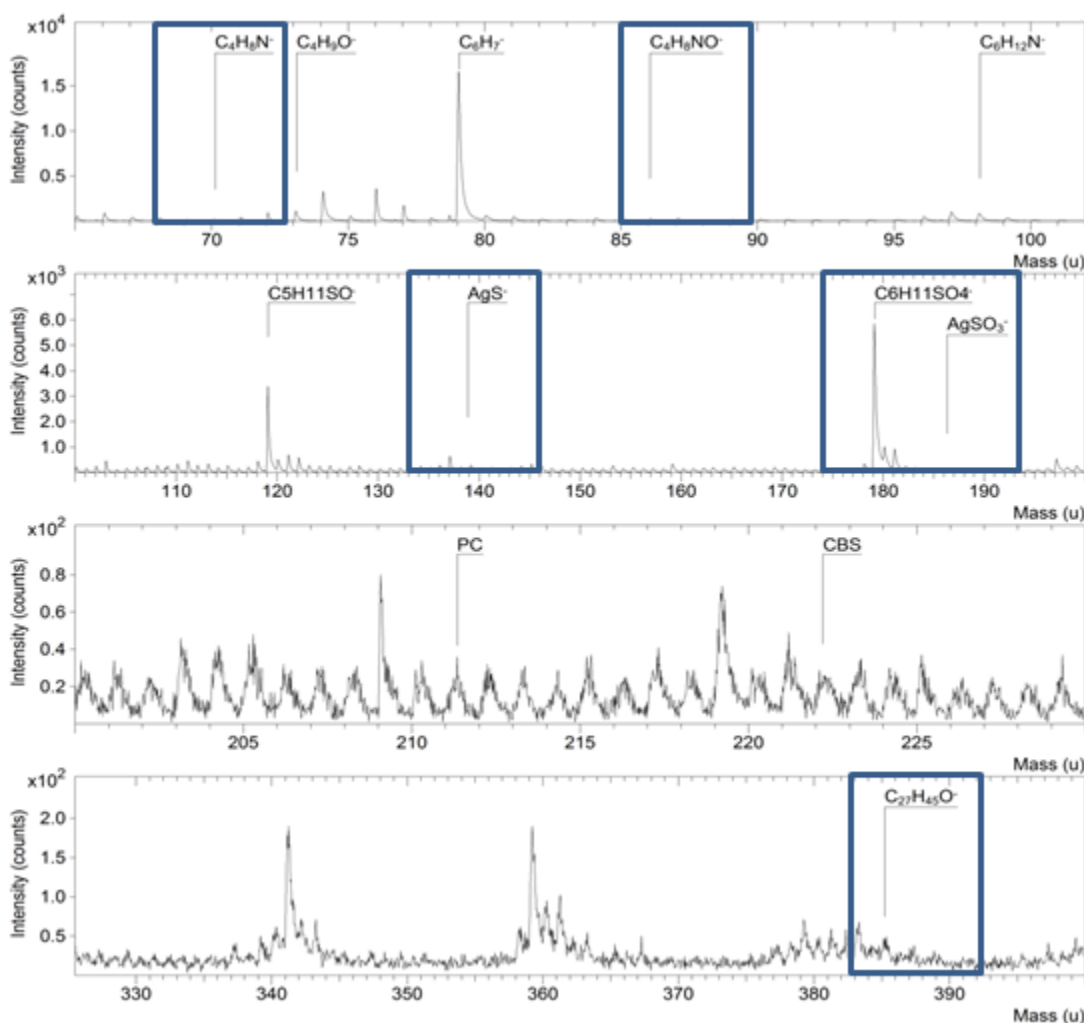

**Fig. S1:** Secondary-ion spectrum (negative polarity) recorded from AgNWs in microglia cells after sputtering with C60+.

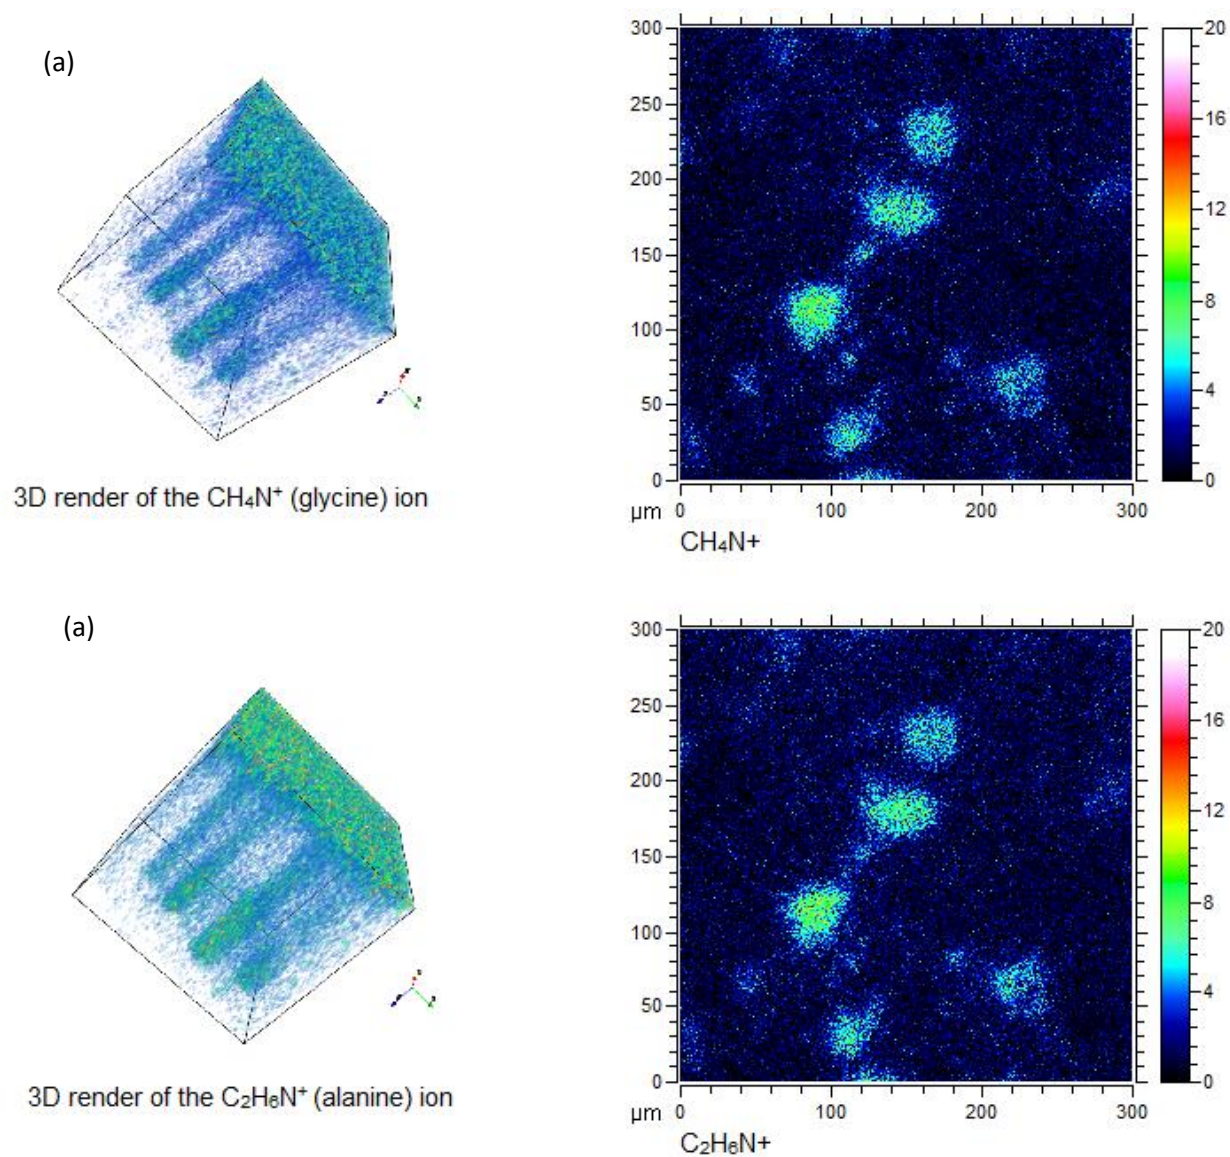

**Fig. S2:** 3D and 2D ion map of (a) the glycine protein fragment and (b) the alanine protein fragment during the ‘sputter clean’ with the C60+ ion beam

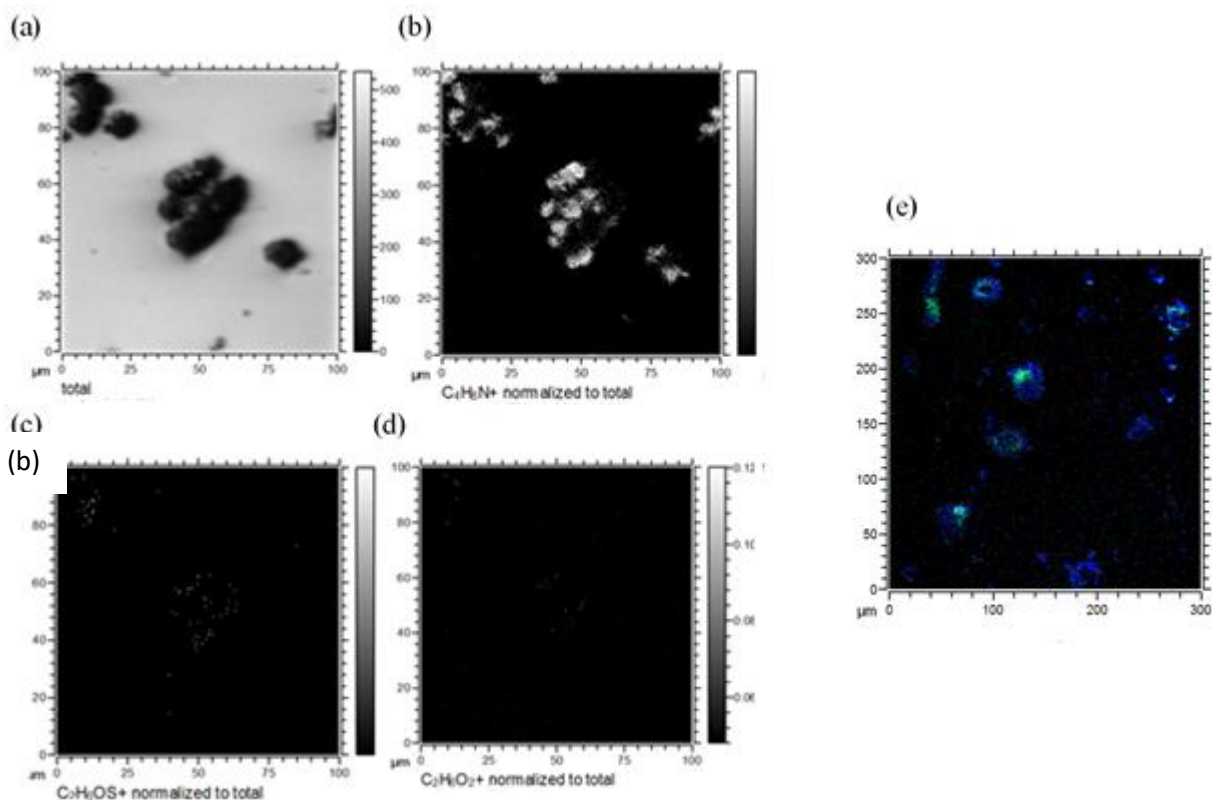

**Fig. S3:** TOF-SIMS imaging (positive ion mode) of (a) microglia cells (24 h) exposed to the AgNWs, pooled signals of (b) amino acid fragment ions, (c) CSE or MPST enzymes fragment ions,  $\text{C}_2\text{H}_6\text{OS}^+$  and (d) CBS enzyme fragment ions,  $\text{C}_2\text{H}_6\text{O}_2^+$ . Unlike CBS, the other two  $\text{H}_2\text{S}$  producing enzymes (CSE or MPST) do not have metal binding ligands but contain S- groups in their ligands (Tables S2-4). Colour scale bars, with amplitude as number of counts are indicated to the right of each ion image. The amplitude of the colour scale corresponds to the maximum number of counts (mc) and the total number of counts (tc) recorded for the specified m/z (it is the sum of counts in all pixels). Field of view: 100  $\mu\text{m} \times 100 \mu\text{m}$ ; (e) Overlay images of protein fragments (blue) and cystathionine fragments (green).

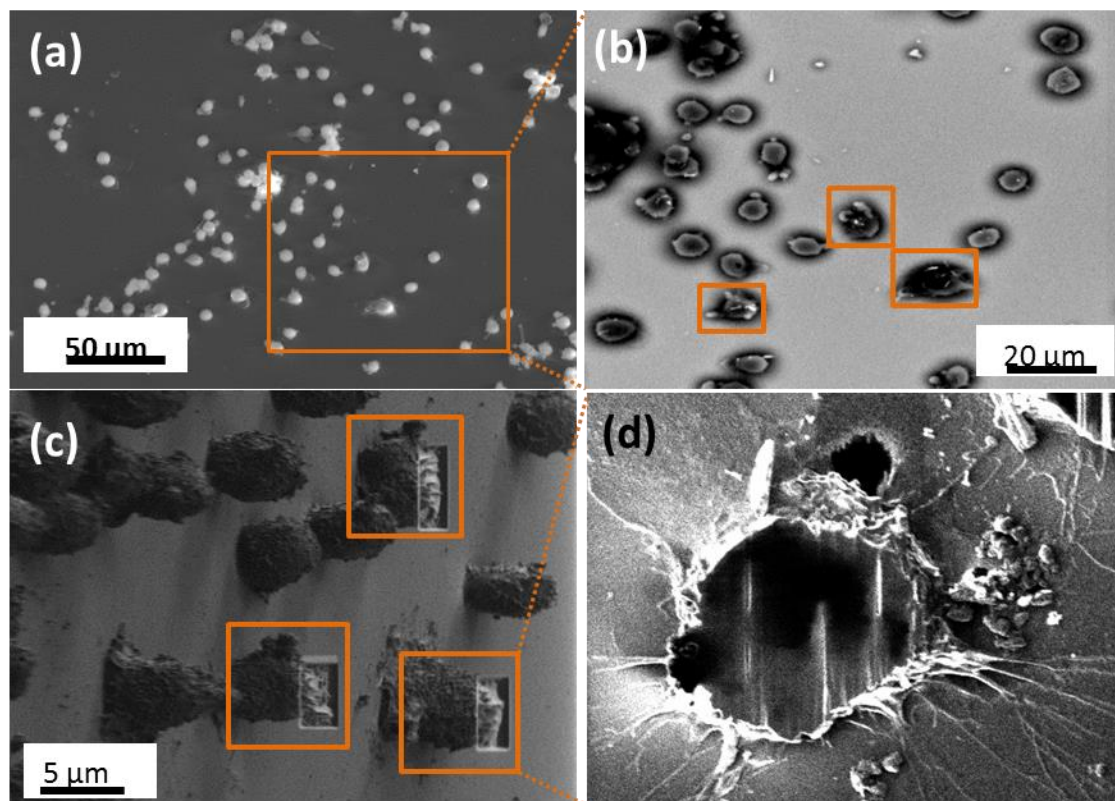

**Fig. S4:** SEM images of microglial cells exposed to AgNWs before FIB milling at (a) low and (b) high magnification and (c) side view and (d) top view after FIB milling.



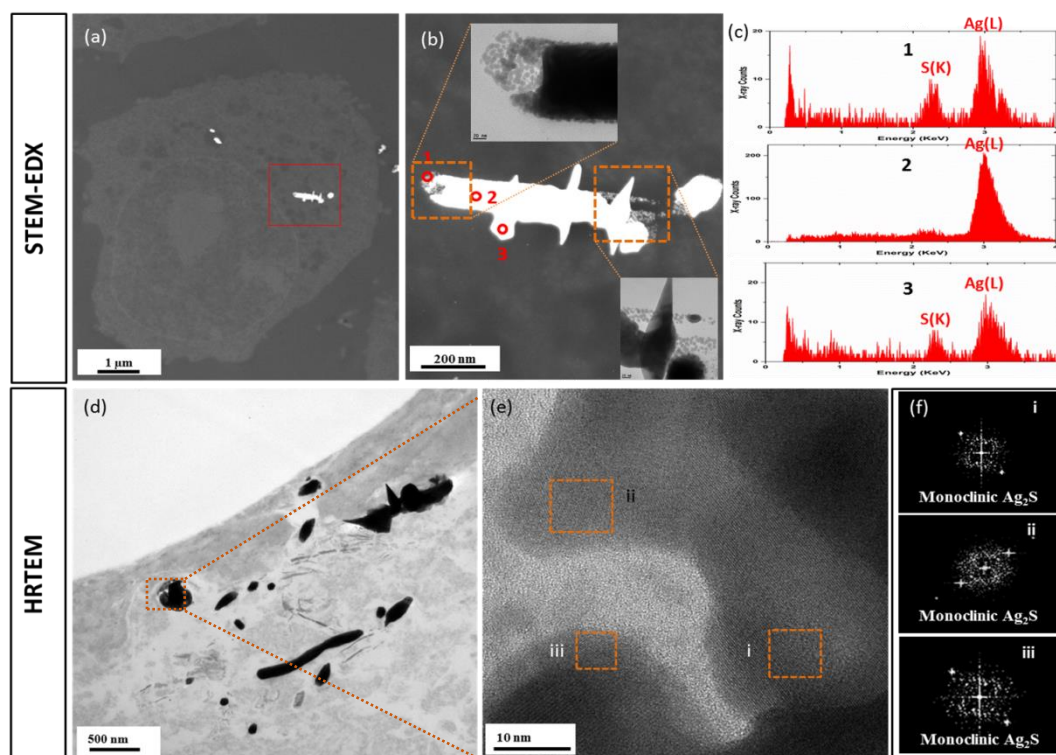

**Fig. S5: AgNW uptake by N9 microglia following 1hr pulse AgNW treatment (50 μg/mL) with a 24 hr chase. HAADF-STEM image of AgNWs in microglia cells (a) and a high magnification image (b) of the selected area in (a). STEM-EDX spectra (c) collected from areas 1-3 marked in (b). High pressure frozen, low temperature acetone-treated and epoxy resin-embedded microglia cellular uptake of (d) AgNWs after a 1 h pulse exposure and 24 h chase. (e) HR-TEM image shows ultrafine particles surrounding the surface of the AgNWs. FFT patterns taken from corresponding areas (i - iii) marked in (e), showing that sulfidation occurred at the AgNWs surface and the presence of a large number of Ag<sub>2</sub>S particles surrounding the AgNWs after uptake by microglia. (N: nucleus; C: cytoplasm; E/L: endosome/lysosome; ES: extracellular space).**

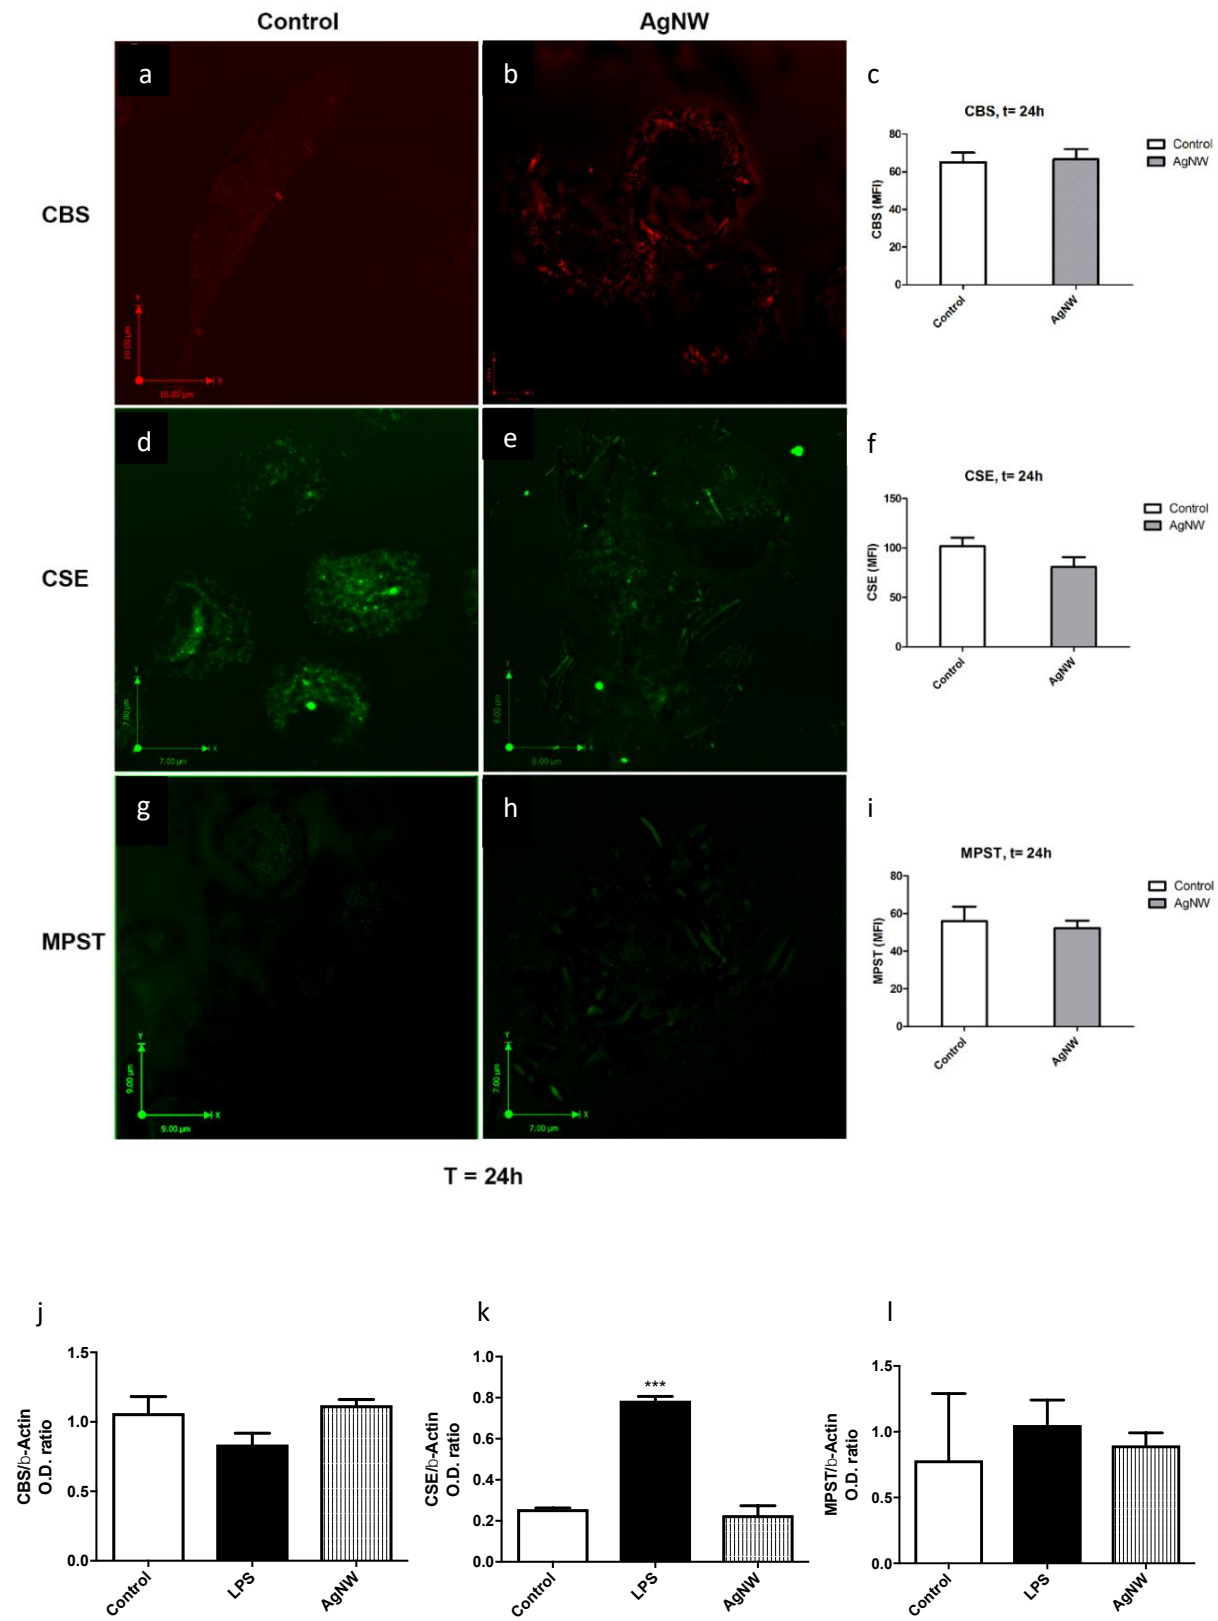



m

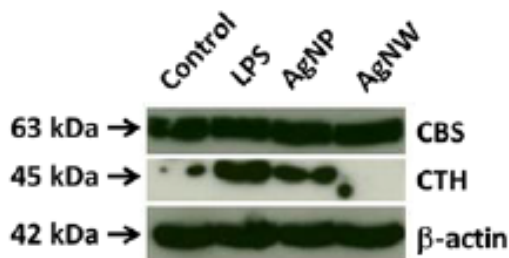

**Fig. S6: a) Quantification of CBS (a-c), CSE (d-f) and MPST (g-i) enzymes in N9 cells exposed to AgNWs (50µg/ml) for 24h in by confocal microscopy.** (c,f,i) The fluorescence detected in 40 cells was subtracted from the background fluorescence, averaged and compared with the control cells. Modulation of microglia (j) CBS, (k) CSE and (l) MPST expression by AgNWs or LPS treatment using immunostaining Western blots quantification method. N9 microglia were treated with AgNWs (50 µg/ml) or LPS (positive control) for 1 h (pulse) followed 24 h chase period. CBS/CSE/MPST protein was then quantified by immunostaining Western blots from whole cell lysates. Immunostaining for β-actin was used as loading control. (j-l) The enzyme expression was quantified by normalizing the enzymes' optical density against the β-actin optical density. \*\*\* indicate  $p < 0.005$  vs. control, as assessed by a one-way ANOVA with a Tukey's post-hoc test. (m) Original Western blots used to plot (j-l) with comparison to the spherical silver nanoparticles used in our previous study that do show increased expression of CSE (here labelled as CTH) [6].

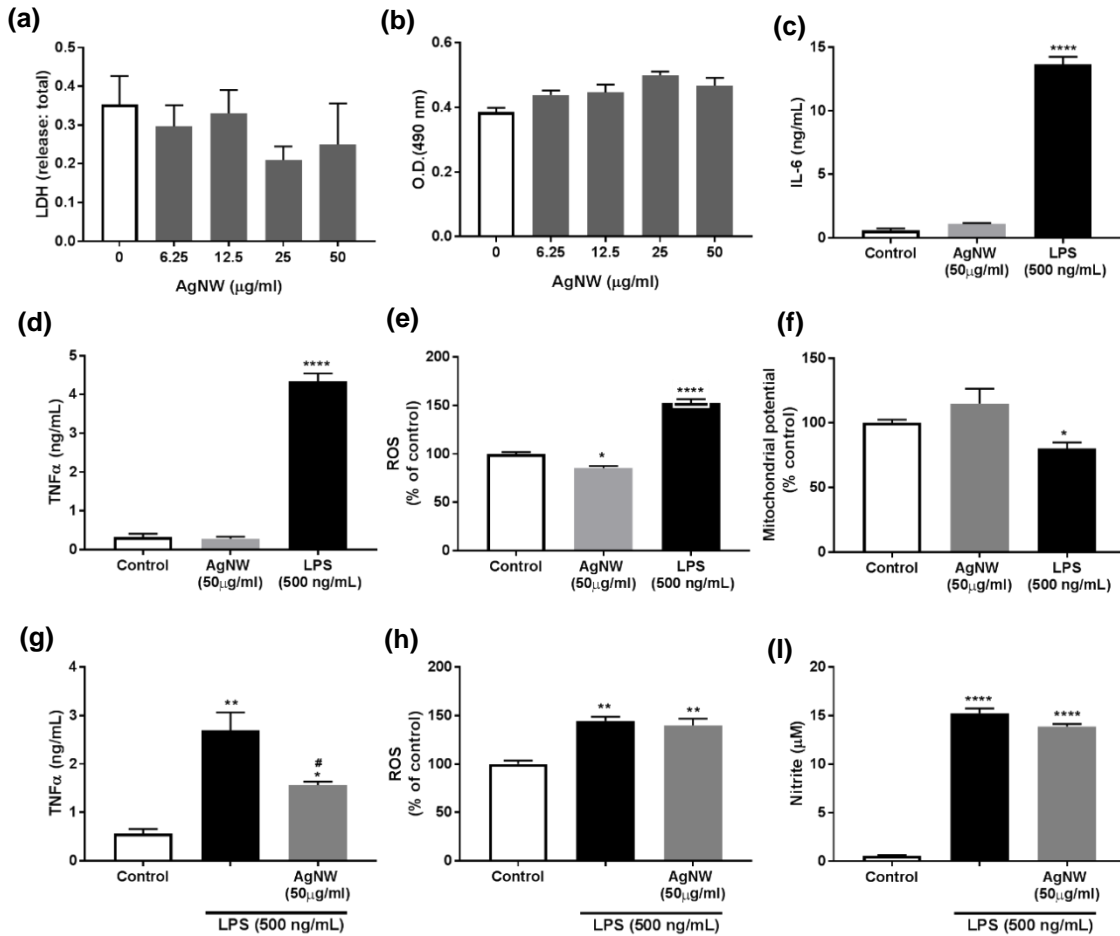

Fig. S7: Modulation of microglial reactivity and cell viability by AgNW treatment. N9 microglial cells were treated with LPS (500 ng/mL) with or without AgNWs for a 1 hr pulse period followed by a 24 h chase period. Cell viability was assessed through (a) LDH release assay, (b) MTS assay and (c) IL-6. Microglial inflammation was assessed through quantification of (d,g) TNF $\alpha$  release, (e,h) ROS production, (f) mitochondrial potential, and (i) nitrite production. Data is presented as mean  $\pm$  SEM of three independent experiments; \*, \*\*, \*\*\*\* indicate  $p < 0.05$ ,  $0.01$ ,  $0.001$ , respectively, vs. control; # indicate  $p < 0.05$  vs. LPS treatment as assessed by a one-way ANOVA with Tukey's post-hoc test.

**Table S1:** Summary of the physicochemical characteristics of AgNWs.

| Material       | Silver Nanowires (AgNWs)                                                     |
|----------------|------------------------------------------------------------------------------|
| Average Size   | 72 nm (36 - 108 nm) in diameter<br>1.5 $\mu$ m (0.1 - 3.1 $\mu$ m) in length |
| Capping Agent  | PVP (poly(vinyl pyrrolidone))<br>average molecular weight $M_w \approx 360k$ |
| Surface Charge | - 14.8 $\pm$ 0.1 mV                                                          |

**Table S2:** List of ligands which are found in the CBS enzyme structures (source: European Protein Data Bank)

Cystathionine- $\beta$ -synthase (CBS) (Enzyme Commission number, EC 4.2.1.22)

| LIGAND | FORMULA                                                          | SYSTEMATIC NAME                                                                       |
|--------|------------------------------------------------------------------|---------------------------------------------------------------------------------------|
| PLP    | C <sub>8</sub> H <sub>10</sub> N O <sub>6</sub> P                | PYRIDOXAL-5'-PHOSPHATE                                                                |
| HEM    | C <sub>34</sub> H <sub>32</sub> Fe N <sub>4</sub> O <sub>4</sub> | PROTOPORPHYRIN IX CONTAINING FE                                                       |
| NA     | Na                                                               | SODIUM ION                                                                            |
| MPD    | C <sub>6</sub> H <sub>14</sub> O <sub>2</sub>                    | (4S)-2-METHYL-2, 4-PENTANEDIOL                                                        |
| ACT    | C <sub>2</sub> H <sub>3</sub> O <sub>2</sub>                     | ACETATE ION                                                                           |
| PE4    | C <sub>16</sub> H <sub>34</sub> O <sub>8</sub>                   | 2-(2-[2-(2-(2-[2-(2-ETHOXY-ETHOXY)-ETHOXY]-ETHOXY-ETHOXY)-ETHOXY]-ETHOXY)-ETHANOL     |
| KOU    | C <sub>11</sub> H <sub>15</sub> N <sub>2</sub> O <sub>8</sub> P  | (E)-N-((3-hydroxy-2-methyl-5-[(phosphonooxy)methyl]pyridin-4-yl)methylidene)-L-serine |
| SEP    | C <sub>3</sub> H <sub>8</sub> N O <sub>6</sub> P                 | PHOSPHOSERINE                                                                         |
| P1T    | C <sub>11</sub> H <sub>15</sub> N <sub>2</sub> O <sub>7</sub> P  | 2-[(3-HYDROXY-2-METHYL-5-[(PHOSPHONOOXY)METHYL]PYRIDIN-4-YL)METHYL)AMINO]ACRYLIC ACID |
| EDO    | C <sub>2</sub> H <sub>6</sub> O <sub>2</sub>                     | 1,2-ETHANEDIOL                                                                        |

OAS                      C<sub>5</sub> H<sub>9</sub> N O<sub>4</sub>                      O-ACETYL SERINE

**Table S3:** List of ligands which are found in the CSE enzyme structures (source: European Protein Data Bank).

**Cystathionine γ-lyase (CSE) (EC 4.4.1.1)**

| <b>LIGAND</b> | <b>FORMULA</b>                                                  | <b>SYSTEMATIC NAME</b>                                                                               |
|---------------|-----------------------------------------------------------------|------------------------------------------------------------------------------------------------------|
| GOL           | C <sub>3</sub> H <sub>8</sub> O <sub>3</sub>                    | GLYCEROL                                                                                             |
| PLP           | C <sub>8</sub> H <sub>10</sub> N O <sub>6</sub> P               | PYRIDOXAL-5'-PHOSPHATE                                                                               |
| OJO           | C <sub>11</sub> H <sub>13</sub> N <sub>2</sub> O <sub>7</sub> P | 2-{[(E)-{3-hydroxy-2-methyl-5-[(phosphonooxy)methyl]pyridin-4-yl}methylidene]amino}prop-2-enoic acid |
| SO4           | O <sub>4</sub> S                                                | SULFATE ION                                                                                          |
| SER           | C <sub>3</sub> H <sub>7</sub> N O <sub>3</sub>                  | SERINE                                                                                               |
| PYR           | C <sub>3</sub> H <sub>4</sub> O <sub>3</sub>                    | PYRUVIC ACID                                                                                         |
| NAK           | C <sub>3</sub> H <sub>5</sub> N O <sub>2</sub>                  | AMINO-ACRYLATE                                                                                       |
| KOU           | C <sub>11</sub> H <sub>15</sub> N <sub>2</sub> O <sub>8</sub> P | (E)-N-({3-hydroxy-2-methyl-5-[(phosphonooxy)methyl]pyridin-4-yl}methylidene)-L-serine                |
| 2AG           | C <sub>5</sub> H <sub>9</sub> N O <sub>2</sub>                  | (2S)-2-aminopent-4-enoic acid                                                                        |
| NO3           | N O <sub>3</sub>                                                | NITRATE ION                                                                                          |
| PEG           | C <sub>4</sub> H <sub>10</sub> O <sub>3</sub>                   | DI(HYDROXYETHYL)ETHER                                                                                |
| BCT           | C H O <sub>3</sub>                                              | BICARBONATE ION                                                                                      |
| BME           | C <sub>2</sub> H <sub>6</sub> O S                               | BETA-MERCAPTOETHANOL                                                                                 |
| CO3           | C O <sub>3</sub>                                                | CARBONATE ION                                                                                        |

**Table S4:** List of ligands which are found in the MPST enzyme structures (source: European Protein Data Bank).

**3-mercaptopyruvate sulfurtransferase (MPST) (EC 2.8.2.1)**

| <b>LIGAND</b> | <b>FORMULA</b>                               | <b>SYSTEMATIC NAME</b> |
|---------------|----------------------------------------------|------------------------|
| GOL           | C <sub>3</sub> H <sub>8</sub> O <sub>3</sub> | GLYCEROL               |
| SO4           | O <sub>4</sub> S                             | SULFATE ION            |
| PYR           | C <sub>3</sub> H <sub>4</sub> O <sub>3</sub> | PYRUVIC ACID           |

**Table S5:** The crystal structure of silver and various silver compounds based on the Inorganic Crystal Structure Database.

| <b>Ag Crystal System (Cubic) - ICSD ref: 01-087-0597</b> |          |          |             |                   |              |
|----------------------------------------------------------|----------|----------|-------------|-------------------|--------------|
| <b>h</b>                                                 | <b>k</b> | <b>l</b> | <b>d(Å)</b> | <b>2Theta (°)</b> | <b>I (%)</b> |
| 1                                                        | 1        | 1        | 2.359       | 38.115            | 100.0        |
| 2                                                        | 0        | 0        | 2.043       | 44.299            | 45.7         |
| 2                                                        | 2        | 0        | 1.445       | 64.443            | 22.5         |
| 3                                                        | 1        | 1        | 1.232       | 77.397            | 22.2         |

  

| <b>AgCl crystal system (Cubic) - ICSD ref: 00-031-1238</b> |          |          |             |                   |              |
|------------------------------------------------------------|----------|----------|-------------|-------------------|--------------|
| <b>h</b>                                                   | <b>k</b> | <b>l</b> | <b>d(Å)</b> | <b>2Theta (°)</b> | <b>I (%)</b> |
| 2                                                          | 0        | 0        | 2.774       | 32.244            | 100.0        |
| 2                                                          | 2        | 0        | 1.962       | 46.234            | 50.0         |
| 1                                                          | 1        | 1        | 3.203       | 27.831            | 50.0         |

  

| <b>Ag<sub>2</sub>O crystal system (Cubic) - ICSD ref: 00-041-1104</b> |          |          |             |                   |              |
|-----------------------------------------------------------------------|----------|----------|-------------|-------------------|--------------|
| <b>h</b>                                                              | <b>k</b> | <b>l</b> | <b>d(Å)</b> | <b>2Theta (°)</b> | <b>I (%)</b> |
| 1                                                                     | 1        | 1        | 2.729       | 32.791            | 100.0        |
| 2                                                                     | 0        | 0        | 2.360       | 38.067            | 28.0         |

  

| <b>Ag<sub>2</sub>S crystal system (Monoclinic) - ICSD ref: 00-014-0072</b> |          |          |             |                   |              |
|----------------------------------------------------------------------------|----------|----------|-------------|-------------------|--------------|
| <b>h</b>                                                                   | <b>k</b> | <b>l</b> | <b>d(Å)</b> | <b>2Theta (°)</b> | <b>I (%)</b> |
| -1                                                                         | 2        | 1        | 2.606       | 34.385            | 100.0        |
| 1                                                                          | 2        | 1        | 2.440       | 36.806            | 80.0         |
| -1                                                                         | 0        | 3        | 2.383       | 37.719            | 75.0         |
| -1                                                                         | 1        | 2        | 2.836       | 31.521            | 70.0         |
| 0                                                                          | 2        | 2        | 2.583       | 34.701            | 70.0         |
| 1                                                                          | 1        | 2        | 2.456       | 36.557            | 70.0         |
| 1                                                                          | 1        | 1        | 3.080       | 28.967            | 60.0         |
| 0                                                                          | 1        | 3        | 2.421       | 37.105            | 60.0         |
| 0                                                                          | 3        | 1        | 2.213       | 40.740            | 45.0         |
| 2                                                                          | 0        | 0        | 2.083       | 43.407            | 45.0         |
| -1                                                                         | 1        | 1        | 3.437       | 25.902            | 35.0         |
| -2                                                                         | 1        | 3        | 1.718       | 53.278            | 20.0         |
| 0                                                                          | 1        | 2        | 3.383       | 26.323            | 20.0         |
